# Supplementary material
Source: PubMed Central journal article supplement (PMC8288937)
Supplement: nwaa037_supplemental_files.pdf [file nwaa037_supplemental_files.pdf]

# Figure 1

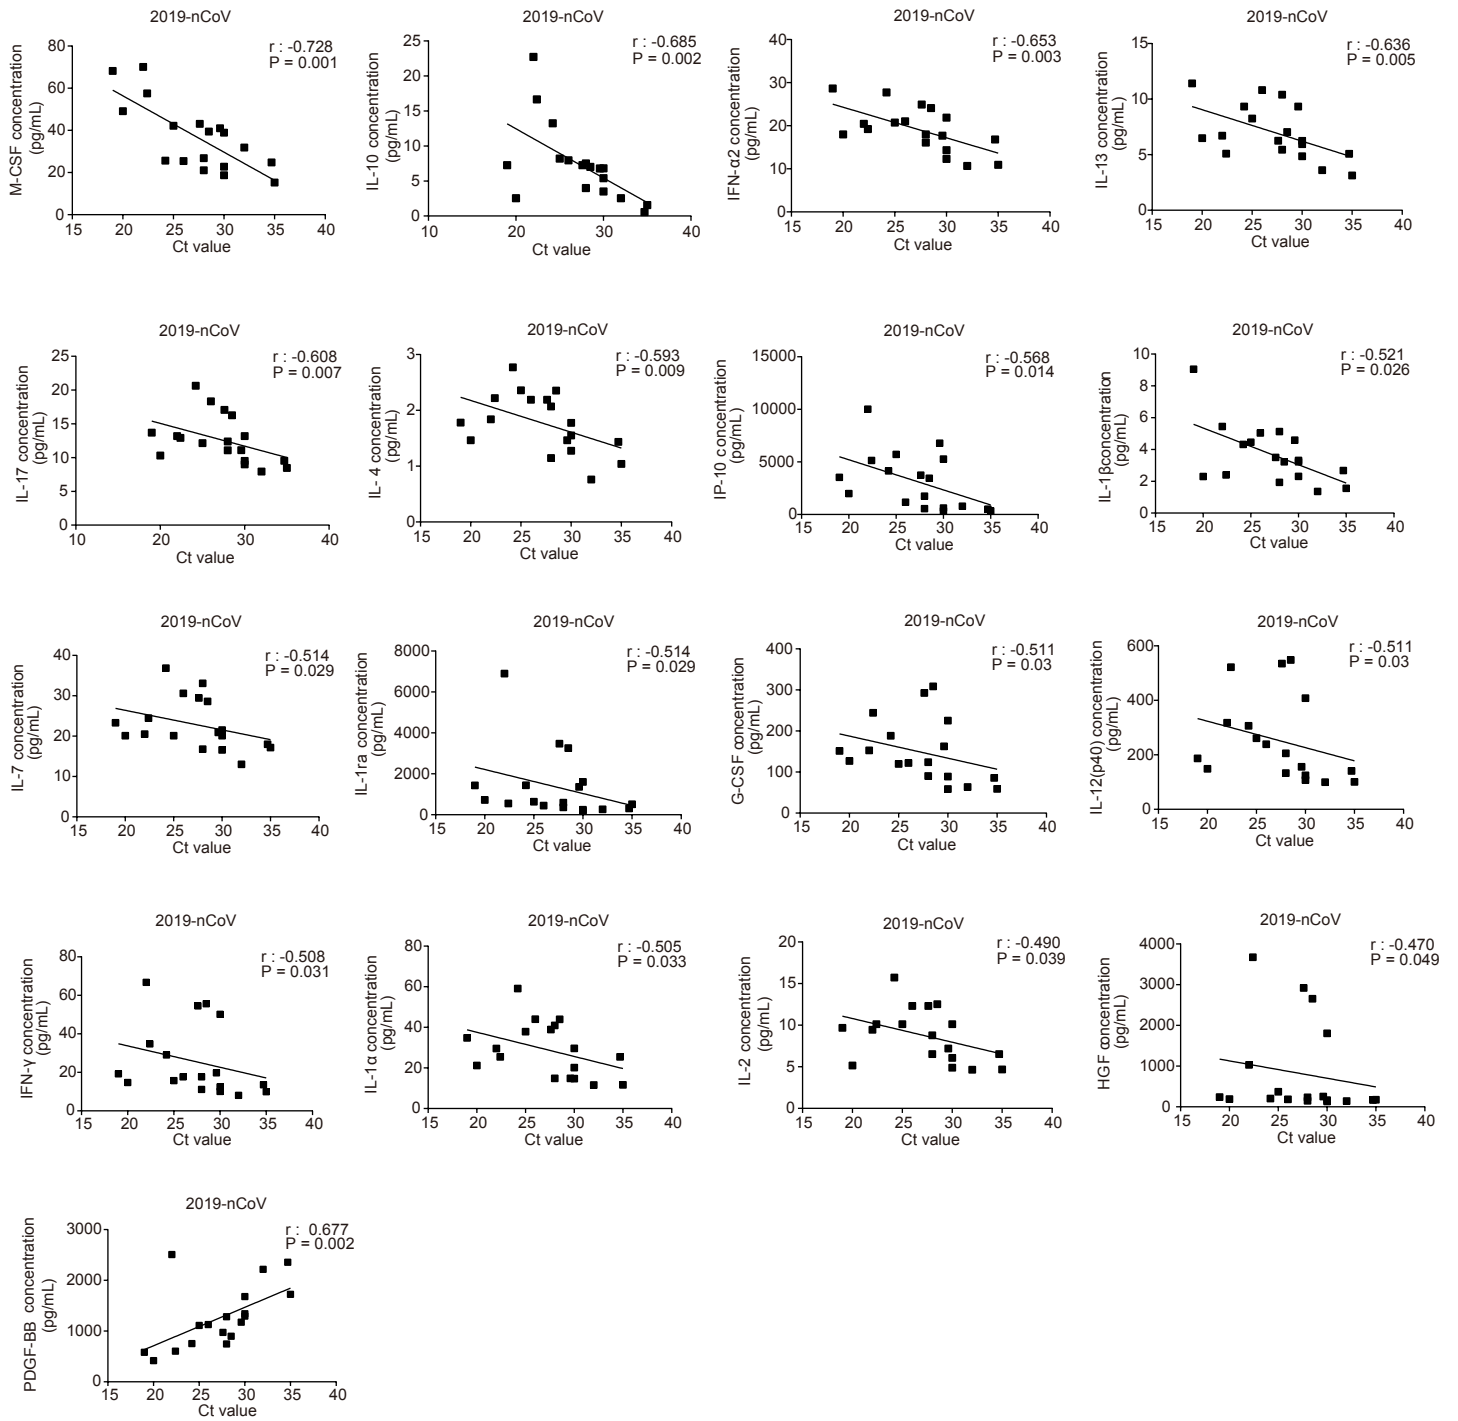

Figure. 2

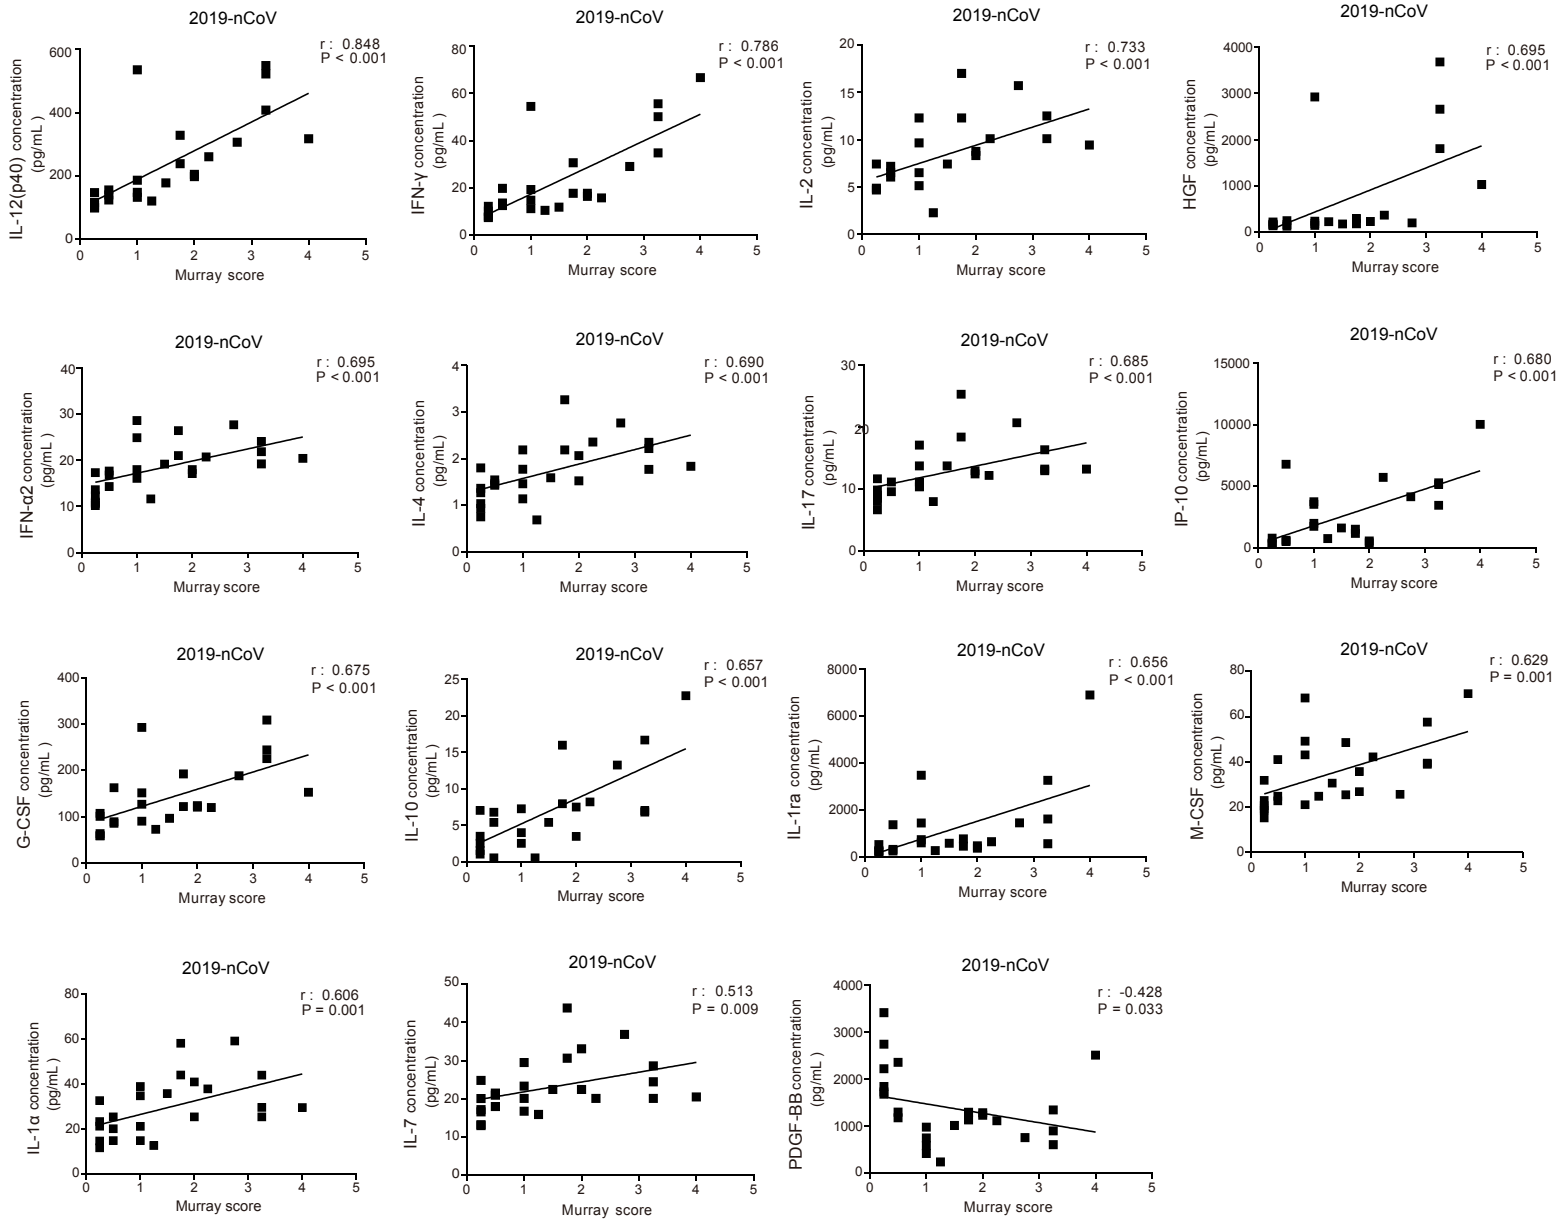

Figure 3

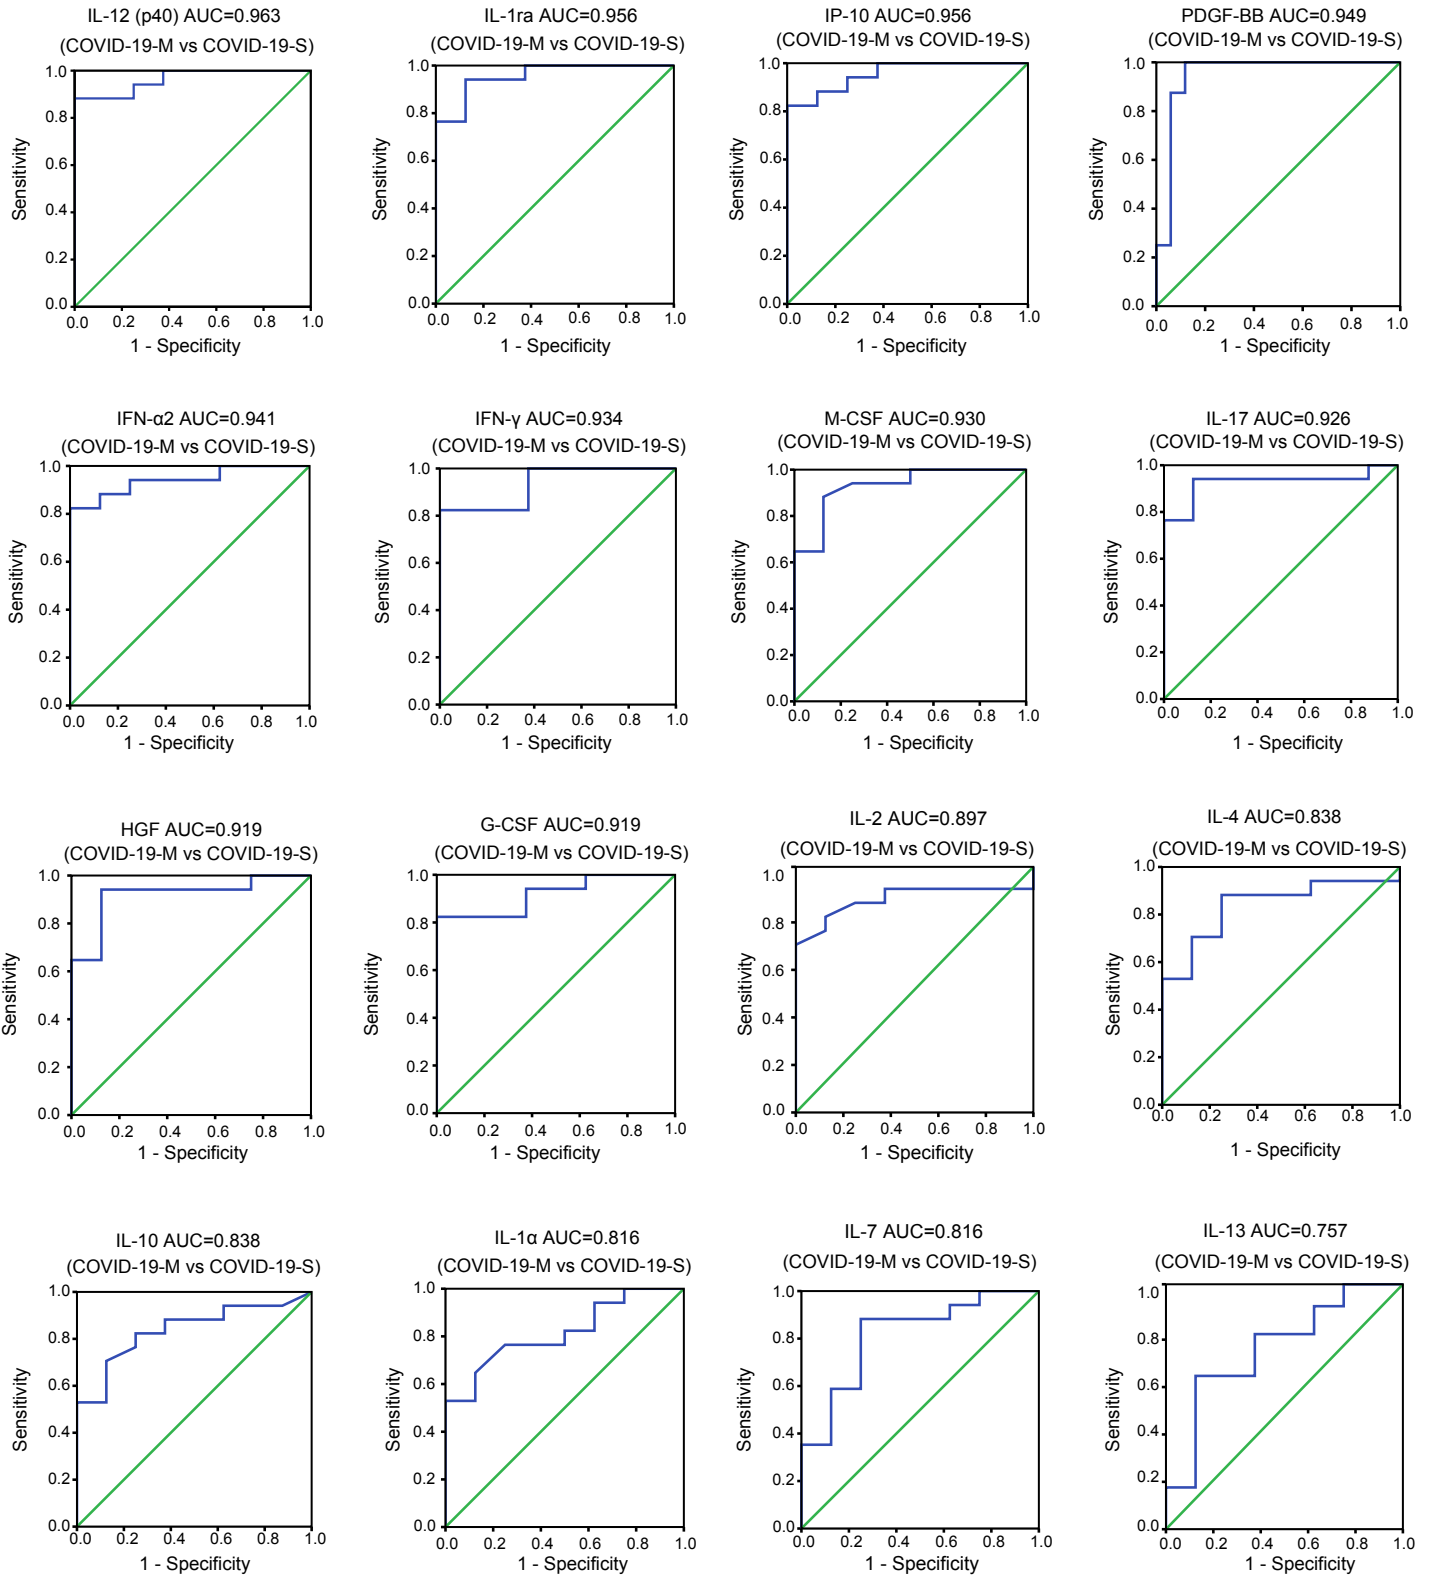

Figure. 4

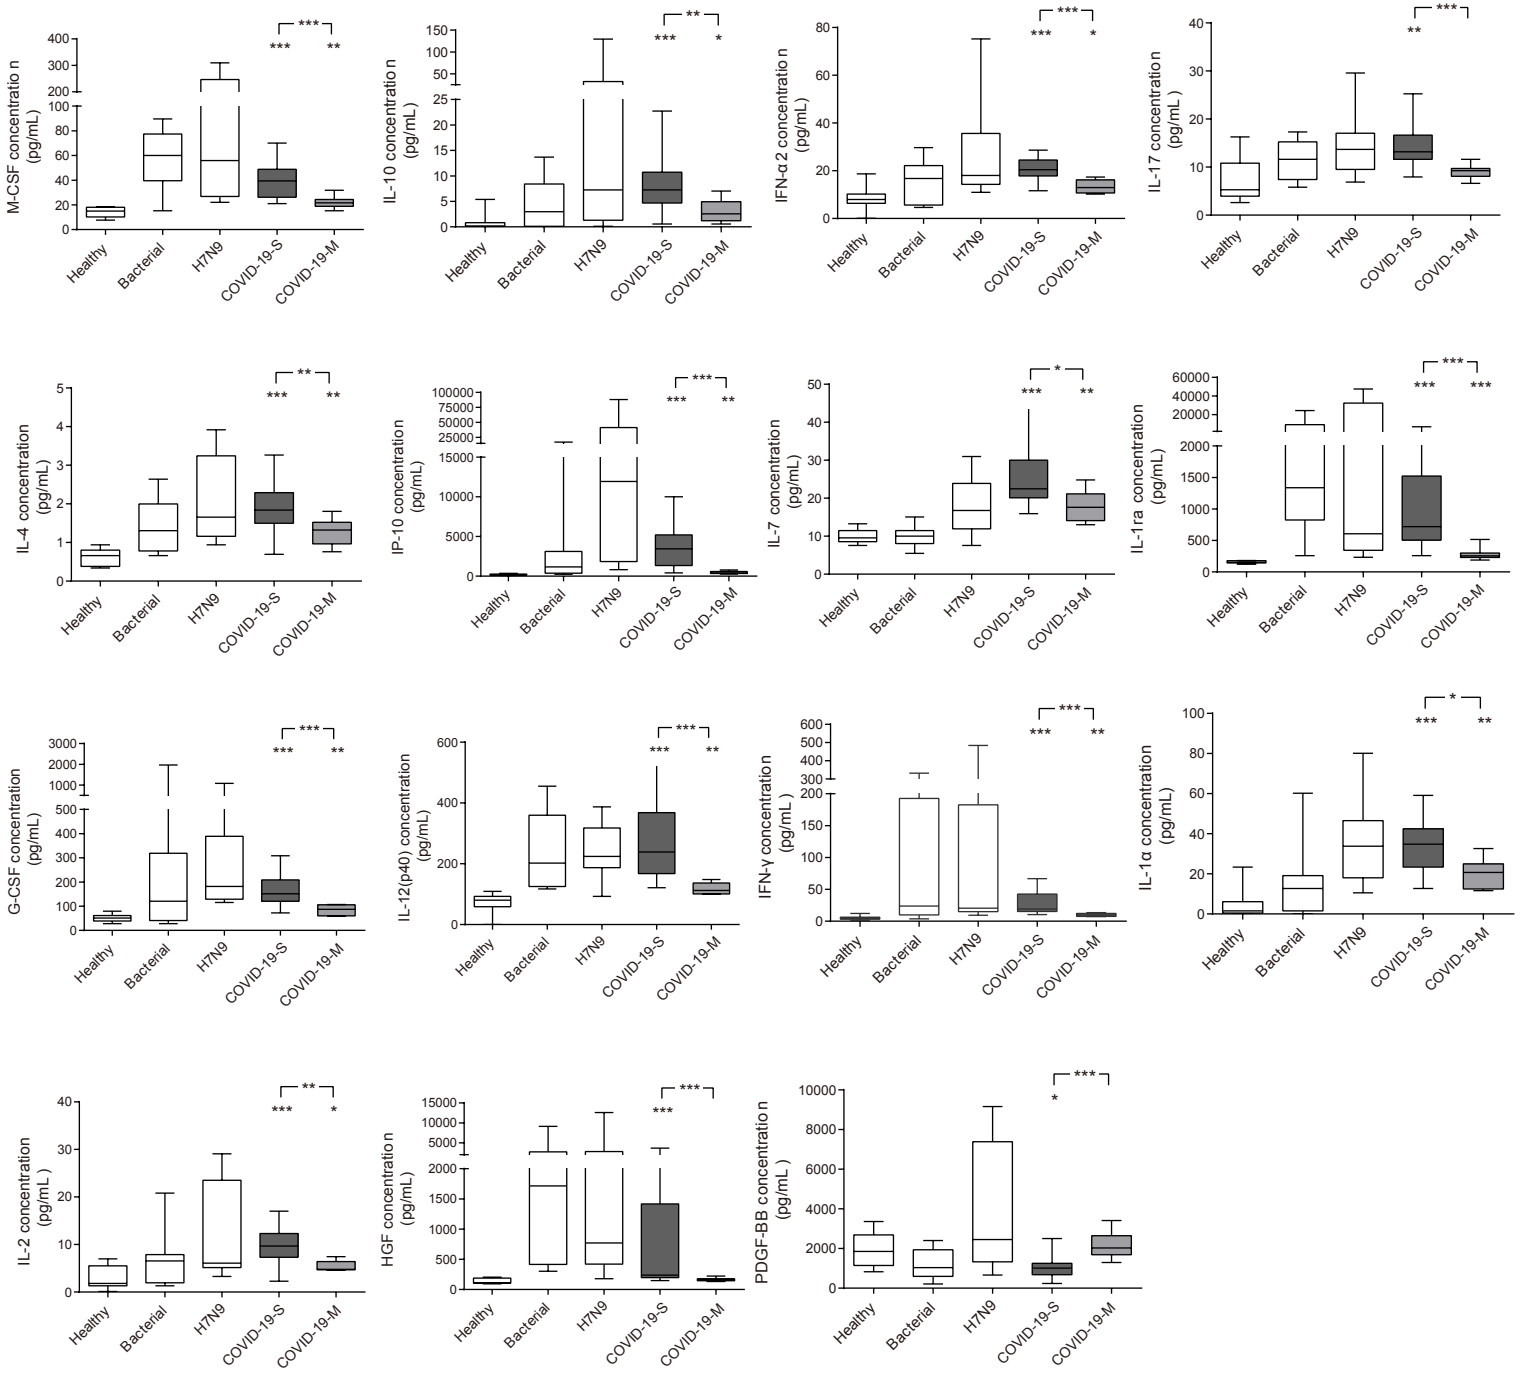

Table S1. Epidemiological and clinical features of subjects hospitalized with 2019-nCoV, H7N9 avian influenza virus and bacterial infections.

| <b>Characteristics</b>                           | <b>2019-nCoV</b> | <b>H7N9</b>      | <b>Bacteria</b> | <b>Control</b> |
|--------------------------------------------------|------------------|------------------|-----------------|----------------|
| <b>Median age (range)</b>                        | 62.5 (10-72)     | 56 (21-67)       | 41 (31.5-49)    | 28 (25-34)     |
| <b>Age subgroups</b>                             |                  |                  |                 |                |
| 0–15 years                                       | 1/12 (8.3%)      | 0/8 (0%)         | 1/8 (12.5%)     | 0/8 (0%)       |
| 16–59 years                                      | 4/12 (33.3%)     | 6/8 (75%)        | 5/8 (62.5%)     | 8/8 (100%)     |
| ≥60 years                                        | 7/12 (58.3%)     | 2/8 (25%)        | 2/8 (25%)       | 0/8 (0%)       |
| <b>Male (%)</b>                                  | 8/12 (66.7%)     | 5/8 (62.5%)      | 5/8 (62.5%)     | 4/8 (50%)      |
| <b>Initial symptoms</b>                          |                  |                  |                 |                |
| Fever                                            | 9/12 (75%)       | 8/8 (100%)       | 5/8 (62.5%)     | 0/8 (0%)       |
| Cough                                            | 12/12 (100%)     | 7/8 (75%)        | 3/8 (37.5%)     | 0/8 (0%)       |
| Headache                                         | 0/12 (0%)        | 3/8 (37.5%)      | 1/8 (12.5%)     | 0/8 (0%)       |
| Myalgia                                          | 4/12 (33.3%)     | 4/8 (50%)        | 0/8 (0%)        | 0/8 (0%)       |
| Chill                                            | 5/12 (41.7%)     | 5/8 (62.5%)      | 0/8 (0%)        | 0/8 (0%)       |
| Nausea or vomiting                               | 2/12 (16.7%)     | 0/8 (0%)         | 1/8 (12.5%)     | 0/8 (0%)       |
| Diarrhea                                         | 3/12 (25%)       | 2/8 (25%)        | 0/8 (0%)        | 0/8 (0%)       |
| <b>Co-existing chronic medical conditions</b>    | 6/12 (50%)       | 6/8 (50%)        | 5/8 (62.5%)     | 0/8 (0%)       |
| Chronic heart disease                            | 4/12 (33.3%)     | 4/8 (33.3%)      | 2/8 (25%)       | 0/8 (0%)       |
| Chronic lung disease                             | 1/12 (8.3%)      | 5/8 (41.7%)      | 1/8 (12.5%)     | 0/8 (0%)       |
| Chronic renal disease                            | 2/12 (16.7%)     | 2/8 (16.7%)      | 0/8 (0%)        | 0/8 (0%)       |
| Chronic liver disease                            | 1/12 (8.3%)      | 3/8 (25%)        | 0/8 (0%)        | 0/8 (0%)       |
| Diabetes                                         | 2/12 (16.7%)     | 6/8 (50%)        | 0/8 (0%)        | 0/8 (0%)       |
| Cancer                                           | 0/12 (0%)        | 4/8 (33.3%)      | 1/8 (12.5%)     | 0/8 (0%)       |
| <b>Bacterial co-infections</b>                   | 2/12 (16.7%)     | 7/8 (87.5%)      | NA              | 0/8 (0%)       |
| <b>Interval, median days (IQ+R)</b>              |                  |                  |                 |                |
| Onset to admission                               | 6.5 (5, 9.25)    | 6 (4.75, 7)      | 1 (0, 3.5)      | NA             |
| Onset to starting antiviral treatment            | 6 (5, 9.25)      | 5.5 (3.75, 6.25) | NA              | NA             |
| Onset to laboratory confirmation                 | 7 (4.5, 14.5)    | 7 (5.75, 8.25)   | 6 (4.5, 8)      | NA             |
| <b>Complications</b>                             |                  |                  |                 |                |
| Pneumonia                                        | 12/12 (100%)     | 8/8 (100%)       | 8/8 (100%)      | 0/8 (0%)       |
| ARDS                                             | 6/12 (50%)       | 7/8 (87.5%)      | 6/8 (75%)       | 0/8 (0%)       |
| Severe ARDS                                      | 2/12 (16.7%)     | 5/8 (62.5%)      | 2/8 (25%)       | 0/8 (0%)       |
| Respiratory failure                              | 3/12 (25%)       | 7/8 (87.5%)      | 5/8 (62.5%)     | 0/8 (0%)       |
| Hepatic insufficiency                            | 2/12 (16.7%)     | 4/8 (50%)        | 4/8 (50%)       | 0/8 (0%)       |
| Renal insufficiency                              | 2/12 (16.7%)     | 2/8 (25%)        | 5/8 (62.5%)     | 0/8 (0%)       |
| Cardiac failure                                  | 1/12 (8.3%)      | 3/8 (37.5%)      | 3/8 (37.5%)     | 0/8 (0%)       |
| Shock                                            | 1/12 (8.3%)      | 1/8 (12.5%)      | 4/8 (50%)       | 0/8 (0%)       |
| <b>Treatment</b>                                 |                  |                  |                 |                |
| Received antivirals ≤ 2 days after illness onset | 1/12 (8.3%)      | 1/8 (12.5%)      | NA              | NA             |
| Received antivirals 3-5 days after illness onset | 4/12 (33.3%)     | 3/8 (37.5%)      | NA              | NA             |
| Received antivirals 6 days after illness onset   | 7/12 (58.3%)     | 4/8 (50%)        | NA              | NA             |
| Corticosteroid                                   | 2/12 (16.7%)     | 8/8 (100%)       | 2/8 (25%)       | NA             |
| Mechanical ventilation                           | 5/12 (41.7%)     | 7/8 (87.5%)      | 7/8 (87.5%)     | NA             |

NA: Not applicable.



Table S3. Cytokine comparison among healthy controls, bacteria-infected patients, H7N9-infected patients and 2019-nCoV infected patients (Day0-7, Day8-14, Day15-)

| Cytokine     | Healthy              |                      |                      | Bacteria             |                      |                      | H7N9                 |                      |                      | 2019-nCoV |          |          |          |          |          |                      |                      |                      |
|--------------|----------------------|----------------------|----------------------|----------------------|----------------------|----------------------|----------------------|----------------------|----------------------|-----------|----------|----------|----------|----------|----------|----------------------|----------------------|----------------------|
|              | P <sup>a</sup> value | P <sup>b</sup> value | P <sup>c</sup> value | P <sup>d</sup> value | P <sup>e</sup> value | P <sup>f</sup> value | P <sup>g</sup> value | P <sup>h</sup> value | P <sup>i</sup> value | Mean      | SE       | Mean     | SE       | Mean     | SE       | P <sup>j</sup> value | P <sup>k</sup> value | P <sup>l</sup> value |
| IL-1β        | 0.037                | 0.020                | 0.019                | -                    | -                    | -                    | -                    | 0.046                | #                    | 4.08      | 1.02     | 3.63     | 0.48     | 3.35     | 0.49     | -                    | -                    | -                    |
| IL-1ra       | 0.001                | <0.001               | 0.003                | #                    | 0.011                | -                    | -                    | -                    | -                    | 1478.23   | 917.46   | 889.43   | 308.43   | 867.02   | 259.33   | -                    | -                    | -                    |
| IL-2         | 0.027                | 0.002                | 0.005                | -                    | -                    | -                    | -                    | -                    | -                    | 6.44      | 0.84     | 8.91     | 0.68     | 7.74     | 0.68     | #                    | -                    | -                    |
| IL-4         | 0.004                | 0.001                | 0.003                | -                    | -                    | -                    | -                    | -                    | -                    | 1.32      | 0.15     | 1.90     | 0.18     | 1.47     | 0.10     | 0.043                | -                    | -                    |
| IL-5         | -                    | -                    | -                    | -                    | -                    | -                    | -                    | 0.020                | -                    | 0.10      | 0.00     | 0.10     | 0.00     | 0.10     | 0.00     | -                    | -                    | -                    |
| IL-6         | -                    | #                    | #                    | 0.028                | 0.017                | -                    | -                    | -                    | -                    | 0.00      | 3.54     | 10.07    | 2.22     | 34.62    | 22.56    | -                    | #                    | -                    |
| IL-7         | 0.003                | 0.001                | 0.003                | #                    | <0.001               | 0.003                | -                    | -                    | -                    | 9.98      | 1.46     | 25.54    | 2.10     | 19.65    | 1.02     | 0.017                | -                    | -                    |
| IL-8         | 0.008                | 0.001                | 0.003                | -                    | -                    | -                    | -                    | 0.049                | -                    | 9.87      | 2.79     | 15.85    | 3.24     | 16.70    | 6.49     | -                    | -                    | -                    |
| IL-9         | -                    | -                    | -                    | -                    | 0.030                | 0.019                | -                    | -                    | -                    | 254.65    | 6.41     | 248.48   | 5.69     | 263.36   | 5.75     | -                    | -                    | -                    |
| IL-10        | 0.006                | 0.001                | 0.009                | -                    | -                    | -                    | -                    | -                    | -                    | 6.45      | 2.79     | 7.05     | 1.36     | 4.33     | 1.17     | -                    | -                    | -                    |
| IL-12 (p70)  | -                    | 0.014                | 0.040                | -                    | 0.012                | 0.012                | -                    | -                    | -                    | 3.62      | 0.34     | 6.74     | 0.53     | 4.78     | 0.53     | -                    | -                    | 0.034                |
| IL-13        | 0.011                | 0.001                | 0.008                | 0.002                | <0.001               | 0.003                | -                    | -                    | -                    | 6.61      | 0.90     | 7.65     | 0.67     | 6.86     | 1.06     | -                    | -                    | -                    |
| IL-15        | -                    | -                    | -                    | -                    | -                    | -                    | -                    | -                    | -                    | 104.65    | 43.18    | 218.73   | 39.35    | 190.10   | 66.90    | #                    | -                    | -                    |
| IL-17        | #                    | 0.008                | 0.040                | -                    | -                    | -                    | -                    | -                    | -                    | 10.26     | 0.99     | 13.49    | 1.33     | 11.56    | 0.67     | -                    | -                    | -                    |
| Eotaxin      | -                    | -                    | -                    | -                    | -                    | -                    | -                    | -                    | -                    | 44.86     | 6.72     | 38.29    | 4.69     | 45.29    | 8.15     | -                    | -                    | -                    |
| FGF basic    | -                    | 0.003                | 0.008                | -                    | -                    | -                    | -                    | -                    | -                    | 37.23     | 3.52     | 43.14    | 2.51     | 39.63    | 3.85     | -                    | -                    | -                    |
| G-CSF        | 0.005                | 0.001                | 0.003                | -                    | -                    | -                    | -                    | 0.036                | -                    | 107.31    | 14.62    | 148.44   | 23.14    | 136.99   | 26.02    | -                    | -                    | -                    |
| GM-CSF       | #                    | 0.038                | #                    | -                    | -                    | -                    | -                    | -                    | -                    | 2.43      | 0.36     | 3.15     | 0.48     | 2.37     | 0.38     | -                    | -                    | -                    |
| IFN-γ        | 0.005                | 0.001                | 0.003                | -                    | -                    | -                    | -                    | -                    | -                    | 19.65     | 8.00     | 22.36    | 4.59     | 22.20    | 7.14     | -                    | -                    | -                    |
| IP-10        | 0.002                | <0.001               | 0.003                | -                    | -                    | -                    | -                    | 0.007                | #                    | 2680.72   | 1294.44  | 1946.64  | 529.30   | 2944.85  | 1304.24  | -                    | -                    | -                    |
| MCP-1 (MCAF) | 0.028                | 0.001                | 0.008                | -                    | -                    | -                    | -                    | -                    | -                    | 34.48     | 11.44    | 41.98    | 10.99    | 74.12    | 40.87    | -                    | -                    | -                    |
| MIP-1α       | 0.009                | <0.001               | 0.004                | -                    | -                    | -                    | -                    | 0.049                | -                    | 2.54      | 0.35     | 4.22     | 1.00     | 3.63     | 0.98     | -                    | -                    | -                    |
| PDGF-βB      | -                    | -                    | -                    | -                    | -                    | -                    | -                    | -                    | -                    | 1651.44   | 426.27   | 1241.39  | 170.50   | 1370.23  | 266.40   | -                    | -                    | -                    |
| MIP-1β       | -                    | -                    | -                    | -                    | -                    | -                    | -                    | 0.025                | -                    | 160.45    | 3.18     | 159.07   | 5.19     | 169.04   | 5.34     | -                    | -                    | -                    |
| RANTES       | -                    | -                    | -                    | -                    | -                    | -                    | -                    | 0.043                | -                    | 5683.14   | 925.79   | 4763.66  | 456.24   | 6404.49  | 1272.99  | -                    | -                    | -                    |
| TNF-α        | #                    | 0.002                | 0.003                | -                    | -                    | -                    | -                    | -                    | -                    | 70.85     | 4.36     | 81.14    | 4.78     | 76.86    | 4.51     | -                    | -                    | 0.042                |
| VEGF         | -                    | -                    | -                    | -                    | -                    | -                    | -                    | 0.030                | #                    | 112.19    | 12.95    | 126.58   | 12.13    | 113.28   | 9.97     | -                    | -                    | -                    |
| IL-1α        | 0.006                | <0.001               | 0.005                | -                    | 0.017                | #                    | -                    | -                    | -                    | 21.46     | 3.21     | 32.58    | 3.78     | 22.07    | 3.02     | #                    | -                    | -                    |
| IL-2Rα       | -                    | 0.014                | #                    | -                    | -                    | -                    | -                    | 0.008                | 0.017                | 68.48     | 11.31    | 91.07    | 12.53    | 89.23    | 10.26    | -                    | -                    | -                    |
| IL-3         | -                    | 0.003                | #                    | -                    | 0.014                | 0.039                | -                    | -                    | -                    | 0.38      | 0.05     | 0.77     | 0.11     | 0.45     | 0.05     | -                    | -                    | 0.017                |
| IL-12 (p40)  | 0.004                | <0.001               | 0.003                | 0.049                | -                    | -                    | -                    | -                    | -                    | 166.36    | 29.38    | 263.82   | 46.56    | 207.24   | 51.43    | -                    | -                    | #                    |
| IL-16        | 0.049                | 0.004                | 0.035                | -                    | -                    | -                    | -                    | -                    | -                    | 56.54     | 15.36    | 48.52    | 18.26    | 154.14   | 65.84    | -                    | -                    | -                    |
| IL-18        | 0.004                | 0.001                | 0.008                | #                    | 0.017                | -                    | -                    | 0.025                | -                    | 111.64    | 28.12    | 79.63    | 8.04     | 95.26    | 12.86    | -                    | -                    | -                    |
| CTACK        | #                    | 0.006                | 0.019                | -                    | -                    | -                    | -                    | #                    | -                    | 486.00    | 83.70    | 641.32   | 88.69    | 728.05   | 174.99   | -                    | -                    | -                    |
| GRO-α        | -                    | -                    | -                    | -                    | -                    | -                    | -                    | -                    | -                    | 669.95    | 20.46    | 657.17   | 23.28    | 723.07   | 51.58    | -                    | -                    | -                    |
| HGF          | 0.037                | 0.006                | 0.013                | 0.005                | 0.025                | 0.019                | -                    | 0.028                | -                    | 306.64    | 121.51   | 875.59   | 354.58   | 518.05   | 322.31   | -                    | -                    | -                    |
| IFN-α2       | 0.015                | 0.001                | 0.012                | -                    | -                    | -                    | -                    | -                    | -                    | 16.63     | 2.47     | 18.58    | 1.37     | 17.93    | 1.02     | -                    | -                    | -                    |
| LIF          | 0.047                | 0.001                | 0.018                | -                    | -                    | -                    | -                    | -                    | -                    | 12.58     | 7.97     | 28.11    | 6.11     | 5.77     | 4.54     | #                    | -                    | -                    |
| MCP-3        | 0.036                | 0.003                | 0.012                | -                    | -                    | -                    | -                    | -                    | -                    | 4.43      | 1.35     | 7.29     | 1.35     | 6.81     | 2.79     | #                    | -                    | -                    |
| M-CSF        | 0.001                | 0.001                | 0.003                | -                    | 0.017                | #                    | -                    | -                    | -                    | 39.97     | 8.50     | 32.22    | 3.53     | 32.31    | 3.97     | -                    | -                    | -                    |
| MIF          | #                    | -                    | -                    | -                    | 0.020                | -                    | -                    | -                    | -                    | 1295.66   | 173.44   | 1116.72  | 113.22   | 1511.60  | 325.36   | -                    | -                    | -                    |
| MIG          | 0.011                | 0.001                | 0.005                | -                    | -                    | -                    | -                    | 0.021                | #                    | 469.21    | 258.66   | 939.15   | 390.93   | 749.79   | 489.35   | -                    | -                    | 0.015                |
| b-NGF        | 0.017                | 0.002                | 0.005                | -                    | -                    | -                    | -                    | -                    | -                    | 1.49      | 0.18     | 2.55     | 0.42     | 2.04     | 0.25     | -                    | -                    | -                    |
| SCF          | -                    | 0.007                | 0.019                | -                    | -                    | -                    | -                    | -                    | -                    | 58.44     | 8.34     | 78.61    | 12.45    | 78.51    | 16.59    | -                    | -                    | -                    |
| SCGF-β       | 0.037                | 0.017                | #                    | -                    | -                    | -                    | -                    | 0.028                | 0.005                | 84399.44  | 14867.23 | 93153.33 | 14483.77 | 78223.91 | 18421.01 | -                    | -                    | -                    |
| SDF-1α       | -                    | -                    | #                    | -                    | -                    | -                    | -                    | -                    | -                    | 761.70    | 52.72    | 750.62   | 33.61    | 846.36   | 78.83    | -                    | -                    | -                    |
| TNF-β        | -                    | 0.001                | 0.001                | -                    | -                    | -                    | -                    | -                    | -                    | 0.91      | 0.57     | 2.35     | 0.51     | 1.62     | 0.52     | -                    | -                    | -                    |
| TRAIL        | 0.002                | 0.001                | 0.003                | #                    | #                    | #                    | -                    | -                    | -                    | 43.32     | 3.81     | 39.70    | 1.77     | 45.13    | 4.31     | -                    | -                    | -                    |

P<sup>a</sup> value: Healthy vs COVID-19 patients (Day0-7)      P<sup>b</sup> value: Bacteria patients vs COVID-19 patients (Day0-7)      P<sup>c</sup> value: H7N9 patients vs COVID-19 patients (Day0-7) vs COVID-19 patients (Day8-14)  
 P<sup>d</sup> value: Healthy vs COVID-19 patients (Day8-14)      P<sup>e</sup> value: Bacteria patients vs COVID-19 patients (Day8-14)      P<sup>f</sup> value: H7N9 patients vs COVID-19 patients (Day8-14)  
 P<sup>g</sup> value: Healthy vs COVID-19 patients (Day15-)      P<sup>h</sup> value: Bacteria patients vs COVID-19 patients (Day15-)      P<sup>i</sup> value: H7N9 patients vs COVID-19 patients (Day15-)  
 # : P value [0.05,0.1], - : P value >0.05

8 samples from 8 healthy control, 8 samples from 8 bacteria-infected patients, 8 samples from 8 H7N9-infected patients, 7 samples from 7 2019-nCoV-infected patients (Day0-7), 13 samples from 9 2019-nCoV-infected patients (Day8-14) and 5 samples from 5 2019-nCoV-infected patients (Day15-).

Table S4. Detection of 2019-nCoV at respiratory and non-respiratory sites.

|                           |        | 2019-nCoV         |                   |            |
|---------------------------|--------|-------------------|-------------------|------------|
|                           |        | Total             | Severe            | Mild       |
| <b>Nasopharynx</b>        |        |                   |                   |            |
| Detectable RNA (n/N)      | Throat | 8/11              | 5/7               | 3/4        |
|                           | Sputum | 7/10              | 6/6               | 1/4        |
| Ct Values (Median; range) | Throat | 30 (23-36)        | 29.2 (25-36)      | 30 (23-35) |
|                           | Sputum | 29.1<br>(20-34.7) | 28.3<br>(20-33.4) | 34.3       |
| <b>BALF</b>               |        |                   |                   |            |
| Detectable RNA (n/N)      |        | 3/5               | 3/4               | 0/1        |
| Ct Values (Median; range) |        | 24 (19-26)        | 24 (19-26)        | U          |
| <b>Plasma</b>             |        |                   |                   |            |
| Detectable RNA (n/N)      |        | 0/12              | 0/8               | 0/4        |
| Ct Values (Median; range) |        | U                 | U                 | U          |
| <b>Rectum</b>             |        |                   |                   |            |
| Detectable RNA (n/N)      |        | 2/7               | 1/5               | 1/2        |
| Ct Values (Median;range)  |        | 27.5 (27-28)      | 28                | 27         |

U: Undetected.

Throat swabs were obtained after 4–18 d (median 10) of illness.

Sputum were obtained after 4–17 d (median 9.5) of illness.

Plasma samples were obtained after 7–10 d (median 9) of illness.

Rectal swabs were obtained after 4–16.5 d (median 9.5) of illness.
